# Molecular Dynamics Analysis of a Novel $\beta 3$ Pro189Ser Mutation in a Patient with Glanzmann Thrombasthenia Differentially Affecting $\alpha IIb\beta 3$ and $\alpha v\beta 3$ Expression

Michel Laguerre<sup>1</sup>, Essa Sabi<sup>2</sup>, Martina Daly<sup>2</sup>, Jacqueline Stockley<sup>2</sup>, Paquita Nurden<sup>3,4</sup>, Xavier Pillois<sup>5</sup>, Alan T. Nurden<sup>3\*</sup>

**1** Institut Européen de Chimie et Biologie, Pessac, France, **2** Department of Cardiovascular Science, University of Sheffield, Sheffield, England, United Kingdom, **3** Plateforme Technologique et d'Innovation Biomédicale, Hôpital Xavier Arnoz, Pessac, France, **4** Centre Hospitalier Universitaire de Marseille, Hôpital Timone, Marseille, France, **5** Unité 1034 Institut National de la Santé et de la Recherche Médicale, Hôpital du Haut-Lévêque, Pessac, France

## Abstract

Mutations in *ITGA2B* and *ITGB3* cause Glanzmann thrombasthenia, an inherited bleeding disorder in which platelets fail to aggregate when stimulated. Whereas an absence of expression or qualitative defects of  $\alpha IIb\beta 3$  mainly affect platelets and megakaryocytes,  $\alpha v\beta 3$  has a widespread tissue distribution. Little is known of how amino acid substitutions of  $\beta 3$  comparatively affect the expression and structure of both integrins. We now report computer modelling including molecular dynamics simulations of extracellular head domains of  $\alpha IIb\beta 3$  and  $\alpha v\beta 3$  to determine the role of a novel  $\beta 3$  Pro189Ser (P163S in the mature protein) substitution that abrogates  $\alpha IIb\beta 3$  expression in platelets while allowing synthesis of  $\alpha v\beta 3$ . Transfection of wild-type and mutated integrins in CHO cells confirmed that only  $\alpha v\beta 3$  surface expression was maintained. Modeling initially confirmed that replacement of  $\alpha IIb$  by  $\alpha v$  in the dimer results in a significant decrease in surface contacts at the subunit interface. For  $\alpha IIb\beta 3$ , the presence of  $\beta 3S163$  specifically displaces an  $\alpha$ -helix starting at position 259 and interacting with  $\beta 3R261$  while there is a moderate 11% increase in intra-subunit H-bonds and a very weak decrease in the global H-bond network. In contrast, for  $\alpha v\beta 3$ , S163 has different effects with  $\beta 3R261$  coming deeper into the propeller with a 43% increase in intra-subunit H-bonds but with little effect on the global H-bond network. Compared to the WT integrins, the P163S mutation induces a small increase in the inter-subunit fluctuations for  $\alpha IIb\beta 3$  but a more rigid structure for  $\alpha v\beta 3$ . Overall, this mutation stabilizes  $\alpha v\beta 3$  despite preventing  $\alpha IIb\beta 3$  expression.

**Citation:** Laguerre M, Sabi E, Daly M, Stockley J, Nurden P, et al. (2013) Molecular Dynamics Analysis of a Novel  $\beta 3$  Pro189Ser Mutation in a Patient with Glanzmann Thrombasthenia Differentially Affecting  $\alpha IIb\beta 3$  and  $\alpha v\beta 3$  Expression. PLoS ONE 8(11): e78683. doi:10.1371/journal.pone.0078683

**Editor:** Kathleen Freson, University of Leuven, Belgium

**Received:** July 5, 2013; **Accepted:** September 13, 2013; **Published:** November 13, 2013

**Copyright:** © 2013 Laguerre et al. This is an open-access article distributed under the terms of the Creative Commons Attribution License, which permits unrestricted use, distribution, and reproduction in any medium, provided the original author and source are credited.

**Funding:** This study was financed by contract N° AP07/08.42 with the Génomuscope d'Evry and from INSERM (ANR-08-GENO-028-03). The funders had no role in study design, data collection and analysis, decision to publish, or preparation of the manuscript.

**Competing Interests:** The authors have declared that no competing interests exist.

\* E-mail: Nurdenat@gmail.com

## Introduction

Glanzmann thrombasthenia (GT) is a rare inherited disease of platelet aggregation caused by quantitative and/or qualitative deficiencies of the  $\alpha IIb\beta 3$  integrin [1–3]. The result is lifelong bleeding due to the inability of platelets to plug injured blood vessels. The *ITGA2B* and *ITGB3* genes that encode  $\alpha IIb\beta 3$  colocalize at chromosome 17q21.32 although their transcription is not coordinated [4]. Biosynthesis of  $\alpha IIb\beta 3$  occurs in megakaryocytes (MKs) in the bone marrow; anucleate platelets are released in large numbers from protrusions called proplatelets extruded into the blood circulation [5]. GT is given by a large variety of nonsense and missense mutations, gene rearrangements including small insertions or deletions, splice site defects and frameshifts that occur across the 45 exons that compose *ITGA2B* and *ITGB3* [2,3]. Whereas  $\alpha IIb$  is mostly confined to the MK lineage,  $\beta 3$  is also present as  $\alpha v\beta 3$ , a major integrin of vascular, blood and tissue cells; in contrast,  $\alpha v\beta 3$  is a very minor component in platelets [6–8]. Mutations in *ITGA2B* are specific for  $\alpha IIb\beta 3$ , but those effecting *ITGB3* extend to both  $\beta 3$ -containing integrins and potentially concern all cell types expressing  $\alpha v\beta 3$ . While a majority

of *ITGB3* mutations affect  $\beta 3$  expression, missense mutations can have different effects on the capacity of  $\beta 3$  to interact with  $\alpha IIb$  and  $\alpha v$ . Indeed, rare  $\beta 3$  mutations have been shown to allow  $\alpha v\beta 3$  expression while preventing the formation and/or maturation of  $\alpha IIb\beta 3$ . Alternatively, while permitting the expression of both integrins they may affect their function differently [9–13].

Elucidation of the crystal structures of the  $\alpha v\beta 3$  and  $\alpha IIb\beta 3$  extracellular domains has allowed a close investigation of the interactions at the head domain interface between  $\beta 3$  and  $\alpha v$  or  $\alpha IIb$  and has revealed distinct structural differences [14–19]. We now report studies that include a molecular dynamics analysis to investigate the effects on integrin structure of a novel  $\beta 3$ Pro189Ser (P163S in the mature protein) mutation that we have located in a case of type I GT. This mutation prevents expression of the  $\alpha IIb\beta 3$  complex while stabilizing the interaction between  $\beta 3$  and  $\alpha v$ .

## Materials and Methods

### Ethics Statement

Written informed consent was obtained from the patient prior to providing blood for the mutation analysis that was performed as

part of the diagnosis of her disease. The patient herself reviewed her case report in the days preceding submittal of the manuscript. The study protocol was approved by the Human Research Ethics Committee of Alsace under the promotion of the French National Institute of Health and Medical Research (INSERM, Paris) under protocol RBM 04-14 for the French National Network for Disorders of Platelet Production and Function (Directors: JP Cazenave and AT Nurden) and was performed according to the Declaration of Helsinki.

## Subjects

The propositus is a 49 year-old French woman of consanguineous parents who was diagnosed with GT when 5 years old (Case History S1). In brief, her platelets failed to aggregate with all physiologic agonists and failed to retract a clot. They minimally bound monoclonal antibodies (MoAbs) to  $\alpha I\text{Ib}\beta 3$  in flow cytometry despite a normal presence of other membrane glycoproteins (Figure S1).  $\alpha I\text{Ib}$  was absent in western blotting performed using a polyclonal antibody to  $\alpha I\text{Ib}\beta 3$  with bound immunoglobulin located using  $^{125}\text{I}$ -labeled Protein A as described [20]; however, residual  $\beta 3$  was present in low amounts and was of normal migration (Figure 1A). As a further control for the specificity of antibody binding, we also studied in parallel platelets of a patient with a large *ITGB3* deletion preventing  $\beta 3$  synthesis [21]. The residual  $\beta 3$  seen for the propositus suggested that  $\alpha v\beta 3$  was maintained, a finding confirmed for platelets by immunogold-labelling and electron microscopy performed according to our standard procedures [8]. It should be noted that  $\alpha v\beta 3$  is organized essentially in intracellular vesicles as first described by us both in normal platelets and in another type I GT patient [8].

## DNA analysis

Genomic DNA was extracted from 200  $\mu\text{l}$  buffy coat (leukocyte-rich zone at the interface between platelet-rich plasma and red blood cells) of a centrifuged EDTA-anticoagulated blood sample, with a QiaAmp<sup>®</sup>DNA minikit (Qiagen S.A., Courtaboeuf, France) according to the manufacturer's protocol. Direct sequencing of all exons and splice sites of *ITGA2B* (30 exons) and *ITGB3* (15 exons) was performed by the French National Sequencing Center (Génoscope, Evry, France). Briefly, exons and flanking regions of *ITGA2B* and *ITGB3* were amplified by polymerase chain reaction (PCR) with a high fidelity Taq polymerase permitting large fragment amplification (TaKaRa LA Taq<sup>®</sup> DNA Polymerase, Millipore SA, Molsheim, France). PCR fragments were sequenced using the BigDye Terminator v3.1 Cycle reaction kit (Life Technologies, Saint Aubin, France) and a 3730 DNA Analyzer from Life Technologies. Further details of the Methods including the structure of all oligonucleotides are available on request. Pathogenicity of mutations was analyzed using Alamut Mutation Interpretation Software (Seine Biopolis, Rouen, France).

## Transfection Studies

The QuikChange Lightning Site-Directed Mutagenesis Kit (Qiagen, Manchester, UK) was used according to manufacturer's instructions to introduce the c.565C>T transition predicting the p.P189S substitution in  $\beta 3$  (P163S in mature  $\beta 3$ ) into a wild-type (WT)  $\beta 3$  expression plasmid, pcDNA3.1-WT $\beta 3$ , to derive the mutated plasmid, pcDNA3.1-P163S $\beta 3$ .

Chinese hamster ovary (CHO) cells were cultured in Roswell Park Memorial Institute (RPMI) 1640-GlutaMAX<sup>™</sup> (Gibco-Life Technologies, Paisley, UK) medium supplemented with 10% fetal calf serum. Cells were transiently transfected with empty plasmid (pcDNA3.1) or the WT- $\beta 3$  or P163S $\beta 3$  expression plasmid either alone, or along with a WT- $\alpha I\text{Ib}$  expression plasmid,

pcDNA3.1-WT $\alpha I\text{Ib}$ . For each well of a 6 well plate, a total of 2  $\mu\text{g}$  of plasmid DNA was diluted in 500  $\mu\text{l}$  of serum-free medium, before adding 5  $\mu\text{l}$  of Lipofectamine LTX (Invitrogen-Life Technologies, Paisley, UK) and incubating the plate at room temperature for 25 minutes to allow formation of Lipofectamine-DNA complexes. CHO cells, grown to 80–90% confluence, were passaged and  $1 \times 10^5$  cells, in 1.5 ml of complete medium, were added to each well, before incubating the plate at 37°C in the presence of 5% CO<sub>2</sub>. Forty eight hours after transfection, cells were harvested and expression of cell surface  $\alpha I\text{Ib}\beta 3$  assessed by flow cytometry on a FACSCalibur flow cytometer (BD Biosciences, Oxford, UK) using fluorescein isothiocyanate (FITC) conjugated anti-CD41 (MCA467F; AbD Serotec, Kidlington, UK) and phycoerythrin (PE) conjugated anti-CD61 (BD555754; BD Biosciences) monoclonal antibodies. Intracellular  $\beta 3$  expression was assessed similarly after fixing and rendering the cells permeable using the BD Cytfix/Cytoperm Kit (BD Biosciences). The ability of WT and  $\beta 3\text{P163S}$  subunits to bind to  $\alpha v$ , expressed endogenously by CHO cells, was assessed using FITC conjugated monoclonal anti- $\alpha v\beta 3$  (LM609; Chemicon, Chandlers Ford, UK).

## Static Modeling of $\alpha I\text{Ib}\beta 3$ and $\alpha v\beta 3$

Models were obtained using the PyMol Molecular Graphics System, version 1.3, Schrödinger, LLC ([www.pymol.org](http://www.pymol.org)) and 3fcs and 1u8c pdb files for crystal structures of  $\alpha I\text{Ib}$  and  $\alpha v$  in complex with  $\beta 3$  in the bent conformation. Amino acids are visualized in the rotamer form showing side chain orientations incorporated from the Dunbrack Backbone library with the maximum probability [2,3].

## Molecular Dynamics Simulations

For  $\alpha I\text{Ib}\beta 3$  we started from the X-ray structure with PDB code 3NIG (resolution 2.25 Å) and for  $\alpha v\beta 3$  with PDB code 3IJE (resolution 2.90 Å). As  $\beta 3$  is very large and would have necessitated long simulation times we reduced the size of the structure examined. The GT database (<http://sinaicentral.mssm.edu/intranet/research/glanzmann>) shows that while a large majority of missense mutations are located in the “head-groups” of the two subunits, few are found at the N-terminal end of  $\beta 3$ . Moreover, the distal extracellular  $\beta 3$ -domain linked to the transmembrane sequence is free and being close to the  $\alpha$ -subunit is prone to stick onto its surface during simulations leading to an abnormal complex. It was therefore decided to truncate  $\beta 3$  at residues 110 and 354. As a result, the extracellular N-terminal domain composing amino acids (aa) 1 to 110 and the membrane proximal C-terminal part represented by residues 354 to 466 were removed. The truncated  $\beta 3$  from P111 to S353 was used for  $\alpha I\text{Ib}\beta 3$  and  $\alpha v\beta 3$ .

In order to check that the truncation of  $\beta 3$  had no detrimental influence on the behavior of the complexes, the two wild-type (WT) assemblies were submitted to a long (60 ns) molecular dynamics simulation. For this, the protein complex was centered in a rectangular water box with dimensions: 110×100×100 Å. Then the whole system was neutralized and 150 mM NaCl added. This resulted in a box with 29,100 to 29,200 water molecules and approximately 184 NaCl molecules (the number may vary in the presence of the mutation). Calculations were accomplished using GROMACS 4.5 and the GROMOS96 force field (G43a1) packages [22]. The model for water was SPC (simple point charge). Molecular dynamics runs were performed at constant temperature (300 K, time constant for coupling  $\tau_p = 0.1$  ps) and pressure (P = 1 bar,  $\tau_p = 0.5$  ps) with a Berendsen coupling algorithm [23]. The time step = 2 fs, particle meshed Ewald (PME)

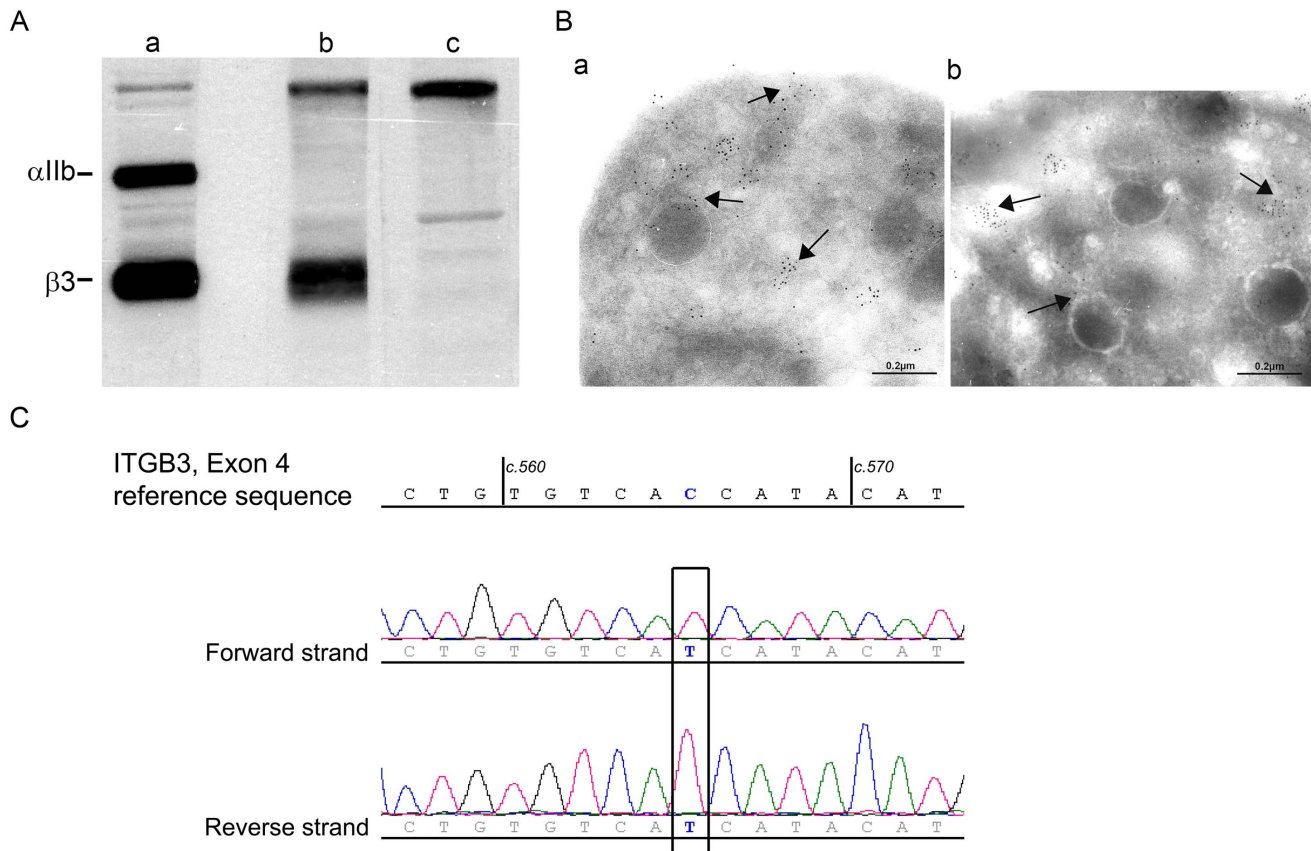

**Figure 1. Initial studies characterizing the molecular defect of  $\alpha$ IIb $\beta$ 3 of the patient's platelets.** A/Western blotting of  $\alpha$ IIb and  $\beta$ 3 in samples of SDS-soluble extracts of (a) control platelets (5  $\mu$ g protein), (b) the patient under study (60  $\mu$ g) and (c) a second type I GT patient [21] with a large *ITGB3* deletion preventing synthesis of  $\beta$ 3 (60  $\mu$ g). The integrin subunits were detected with a polyclonal antibody to  $\alpha$ IIb $\beta$ 3 with bound IgG located using  $^{125}$ I-labeled protein A. B/Immunogold labeling was performed on frozen-thin platelet sections using a pool of murine monoclonal antibodies specific for the  $\alpha$ v subunit [8] and bound antibody located for platelets from (a) a control donor and (b) from the patient using a species-specific second antibody to mouse IgG adsorbed on 5 nm gold particles and electron microscopy. Arrows highlight the largely vesicular distribution of  $\alpha$ v $\beta$ 3. C/Direct sequencing of genomic DNA of the patient (forward and reverse strands) for exon 4 of *ITGB3*. The nucleotide concerned by the mutation is framed. The patient is homozygous for a c.565 C/T transition leading to a p.Pro189Ser substitution (P163S in the primary  $\beta$ 3 structure nomenclature).

doi:10.1371/journal.pone.0078683.g001

method [24] was used with a cubic grid (1  $\text{\AA}$ ), Van der Waals (VDW) cut off = 10  $\text{\AA}$ , and frames were saved every 1000 steps.

In the same way, the  $\beta$ 3 mutant P163S was created via the appropriate module in Discovery Studio version 3.1 and the two mutated complexes were submitted to identical molecular dynamics runs. One simulation was performed on truncated  $\beta$ 3 alone, either WT or with the P163S mutation. Here we used a smaller water box with dimensions: 80  $\times$  80  $\times$  80  $\text{\AA}$  containing around 15,700 water molecules and 93 NaCl molecules. The molecular dynamics simulations were identical to the large box. In trajectory analyses root mean square deviations (RMSD) and root mean square fluctuations (RMSF) were calculated on Calpha positions as described in Jallu et al [25].

## Results

### Molecular Characterization and Mutation Analysis

As shown in Figure 1A and Figure S1, platelets of the patient have a severe deficit in  $\alpha$ IIb $\beta$ 3 that is characteristic of type I GT [1]. Small amounts of residual  $\beta$ 3 were observed by Western blotting and  $\alpha$ v $\beta$ 3 was normally localized in her platelets by immunoelectron microscopy (Figure 1B). This presence would

suggest a genetic defect of *ITGA2B*. But unexpectedly, this was not confirmed by direct sequencing of *ITGA2B* (30 exons) and *ITGB3* (15 exons) and their splice sites with results showing a homozygous C to T transition at position 565 of the cDNA (c.565C>T) within exon 4 of the *ITGB3* gene. This gave a p.Pro189Ser substitution (P163S in the mature protein) (Figure 1C). No other potential pathological mutations were located in either gene. Of interest, genotyping for the HPA1a/1b alloantigen system (L33P in the mature protein) carried by  $\beta$ 3 showed homozygosity for the rare  $\beta$ 3 HPA-1b alloantigen, a finding restricted to about 2% of Caucasians [26].

$\beta$ 3P163 is highly conserved within mammals and vertebrates (Figure S2) and within different human  $\beta$ -subunits suggesting that it is important for integrin biosynthesis and/or function. According to the Alamut software, the physical and chemical deviation between a proline and a serine is important (Grantham score: 74) and according to the SIFT (sorting inherent from tolerant) score this mutation is predicted to be deleterious (SIFT score: 0.0).

### Expression Studies in CHO Cells

The potential pathogenicity of the P163S substitution in  $\beta$ 3 was further investigated after introduction of the mutation into a  $\beta$ 3

expression construct and transient expression in CHO cells, either alone to give rise to a chimeric complex with endogenous hamster  $\alpha v$ , or with co-expression of normal human  $\alpha IIb$  (Figure 2). There was a 94% reduction in surface expression of the  $\alpha IIb\beta 3$  receptor in CHO cells expressing P163S $\beta 3$  compared to those expressing WT $\beta 3$  mirroring the deficit in expression of  $\alpha IIb\beta 3$  observed in platelets from the patient with the defect (Figure 2A). In contrast, assessment of  $\beta 3$  after permeabilisation of the cells revealed that the  $\beta 3P163S$  subunit was expressed intracellularly at 71% of the levels of those of WT $\beta 3$  (Figure 2B) and staining of  $\alpha v\beta 3$  on CHO cells transfected with  $\beta 3$  alone indicated that P163S $\beta 3$  was able to form a chimeric complex with hamster  $\alpha v$  which was expressed at 78% of the levels of the chimeric complex of WT $\beta 3$  and hamster  $\alpha v$  (Figure 2C). Moreover, labeling of cells transfected with the WT and P163S $\beta 3$  subunits alone, using the monoclonal antibody to  $\beta 3$  to detect the chimeric complex of  $\alpha v\beta 3$ , showed no difference between cells expressing WT $\beta 3$  and P163S $\beta 3$  subunits (Figure 2D).

### Static Modeling Analysis

Crystallography showed that  $\beta 3P163$  residue is situated at the interface between the  $\alpha IIb$  or  $\alpha v$  and  $\beta 3$  subunit head domains [14,17]. This is illustrated by static modeling showing the contacts (colored) between the wild-type (WT) headpieces of  $\alpha IIb$  and  $\alpha v$  (in blue) with  $\beta 3$  (in red) (Figure 3A and B). Strikingly, the adjoining  $\beta 3S162$  is also mutated in a case of GT underlining the importance of this sequence situated in the  $\beta$ -I domain (see Discussion). A greater surface area and an increased number of amino acids participate in the interaction between  $\beta 3$  and  $\alpha IIb$  compared to  $\alpha v$  both for the domain containing the  $\beta 3P163S$  mutation (A.1 and B.1 windows) and in the entire complex between the headpieces. Significantly, as well as  $\beta 3P163$ , amino acids engaged in H-bonds within  $\alpha IIb\beta 3$  and  $\alpha v\beta 3$  are highly conserved through species (Figure S2) although to a lesser extent within different  $\alpha$ -subunits of the integrin family in man. Interestingly, this initial analysis highlighted only a single H-bond between  $\beta 3P163$  and H113 in  $\alpha v$  (see Box B1).

### Molecular Dynamics Analysis

We then used molecular dynamics simulations to examine the effects of the P163S substitution on  $\alpha IIb\beta 3$  and  $\alpha v\beta 3$  structure. We first plotted the RMSD (root mean square deviation) for each C- $\alpha$  position of wild type (WT) or P163S substituted  $\beta 3$  in complex with  $\alpha IIb$  or  $\alpha v$  (Figure 4). Both integrin complexes show equivalent movements of the  $\beta 3$  backbone. The introduction of S163 induced only small changes in fluctuations at the site of the mutation (red arrows) for  $\beta 3$  in complex with  $\alpha IIb$  or with  $\alpha v$ . However, more substantial changes occur approximately 100 amino acids onward with a dramatic increase in movements when mutated  $\beta 3$  is in complex with  $\alpha IIb$  and, in contrast, a decrease and stabilization of the backbone structure when mutated  $\beta 3$  is associated with  $\alpha v$  (dotted box).

The influence of the P163S mutation on the secondary structures of  $\beta 3$  in complex with  $\alpha IIb$  or  $\alpha v$  was then examined in timeline plots (Figure 5). From left to right of these plots it is possible to follow the influence of the mutation on the secondary structure from the beginning (on the left) to the end of the dynamics run (after 50 ns of full dynamics). The main secondary structures (alpha helices in magenta and beta-strands in yellow) are largely unaffected by the mutation. Again, while the  $\beta 3$  secondary structure at the site of the substitution appears unaffected (red arrows), changes occur around 100 amino acids onwards (blue dotted box). Significantly, while a 3–10 amino acid  $\alpha$ -helix (in blue) beginning at position 259 and framed by two  $\beta$ -turns (in

green) can be clearly distinguished in WT  $\alpha IIb\beta 3$ , the presence of S163 results in a loss of the last  $\beta$ -turn. This latter structure is also lost when  $\beta 3$  is associated with  $\alpha v$ . Other differences are the loss of a small  $\alpha$ -helix around position 229 for the  $\alpha$ -subunit in  $\alpha v\beta 3$  and the appearance of a small  $\alpha$ -helix around position 170 for the  $\beta$ -subunit in  $\alpha v\beta 3$ . A 3–10 amino acid  $\alpha$ -helix visible between position W129 and N148 was transient in nature when mutated  $\beta 3$  was in complex with  $\alpha IIb$  and was lost after 10 to 15 ns of molecular dynamics, its significance is unknown.

In the WT integrins, the nature of the  $\alpha$ -subunit clearly has a significant influence on the number of hydrogen bonds engaged by  $\beta 3$  (Table I) and confirms the static analysis. As measured in the last 6 ns of the molecular dynamics runs, in comparison to  $\alpha IIb\beta 3$ ,  $\alpha v\beta 3$  shows a small global increase in H-bonds (+2.5%) and at the same time a marked decrease in the number of inter-subunit H-bonds (–23.3%). This suggests either a decreased stability of WT  $\alpha v\beta 3$  compared to  $\alpha IIb\beta 3$  or a weaker binding between the subunits in  $\alpha v\beta 3$ . With  $\beta 3S163$ , the consequences are different. For  $\alpha IIb$  there is a moderate increase (+11%) in inter-subunit H-bonds and a small reduction in the global H-bonds network (–3.4%). However, for  $\alpha v\beta 3$  the mutation induces a dramatic increase (+41.5%) in inter-subunit H-bonds but a negligible decrease (–0.6%) in the H-bond global network (Table I). Overall, compared to the WT proteins, the P163S mutation induces a straightening of the inter-subunit domain that is slight with  $\alpha IIb\beta 3$  but extensive with  $\alpha v\beta 3$ . In the same way, global RMSD analyses of the complexes throughout 60 ns of molecular dynamics revealed  $\beta 3$  rearrangements that were modest with  $\alpha IIb$  (black and green traces) and profound with  $\alpha v$  (red and blue traces) (Figure S3).

In terms of individual bonds, in  $\alpha IIb\beta 3$  the newly introduced S163 on  $\beta 3$  exchanges strong H-bonds with E168 on the  $\alpha$ -subunit. This contrasts with the WT complex where E168 exchanges H-bonds essentially with A263 on  $\beta 3$  and W110, P126 and F171 on  $\alpha IIb$  all of which are lost in the presence of the mutation. Moreover, the new S163 now also exchanges H-bonds with R216 and L262 on  $\beta 3$ . P163 does not appear in the WT H-bond list and neither do R216 and L262. P163 is also not in the H-bond list for WT  $\alpha v\beta 3$  where the introduced S163 now forms weak H-bonds with L262 and N156 on  $\alpha v$ . The main H-bonds in WT  $\alpha v\beta 3$  are between D259 ( $\beta 3$ ) and Y275 ( $\alpha v$ ) S291 ( $\beta 3$ ) and E311 ( $\alpha v$ ) and between T296 ( $\beta 3$ ) and L309 ( $\alpha v$ ). In the presence of S163, the interaction between S291 ( $\beta 3$ ) and E311 ( $\alpha v$ ) is much stronger while that between Y275 ( $\alpha v$ ) and D259 ( $\beta 3$ ) is weaker. Several new interactions appear: S300 ( $\beta 3$ ) with D306 ( $\alpha v$ ), D259 ( $\beta 3$ ) with Y221 ( $\alpha v$ ) and Y166 ( $\beta 3$ ) with Y178 or E121 ( $\alpha v$ ).

Major changes also occur for  $\beta 3R261$  that exchanges H-bonds with a number of amino acids on  $\alpha IIb$  in the WT integrin: Y237, A95, F21, F419, W110, G170, F171 and Y288 while only forming H-bonds with Y237 and F171 in the mutated form (Figure S4). For  $\alpha v$ , the number of H-bonds involving  $\beta 3R261$  shows little change although they involve different partners: Y224, Y406, F278, Y406 and Y224 in the WT form; and Y406, F178, F159, Y224 and A96 in the presence of  $\beta 3S163$ .

### Summary of the Effects of the P163S Substitution

The major structural changes are highlighted when the WT and mutant forms of both  $\alpha IIb\beta 3$  and  $\alpha v\beta 3$  are superimposed (Figure 6). For  $\alpha v\beta 3$  note the unfolding of the small  $\alpha$ -helix close to position 163 (between 169 and 174, lower yellow arrow, Figure 6B); a displacement towards the interface of the  $\alpha$ -helix beginning at position 259 on  $\beta 3$  (yellow\*) and the new fold appearing in the P163S mutant (between 166 and 174, yellow arrow) that projects toward the interface resulting in a clockwise rotation of the  $\alpha v$  subunit (yellow curved arrows). Comparison of

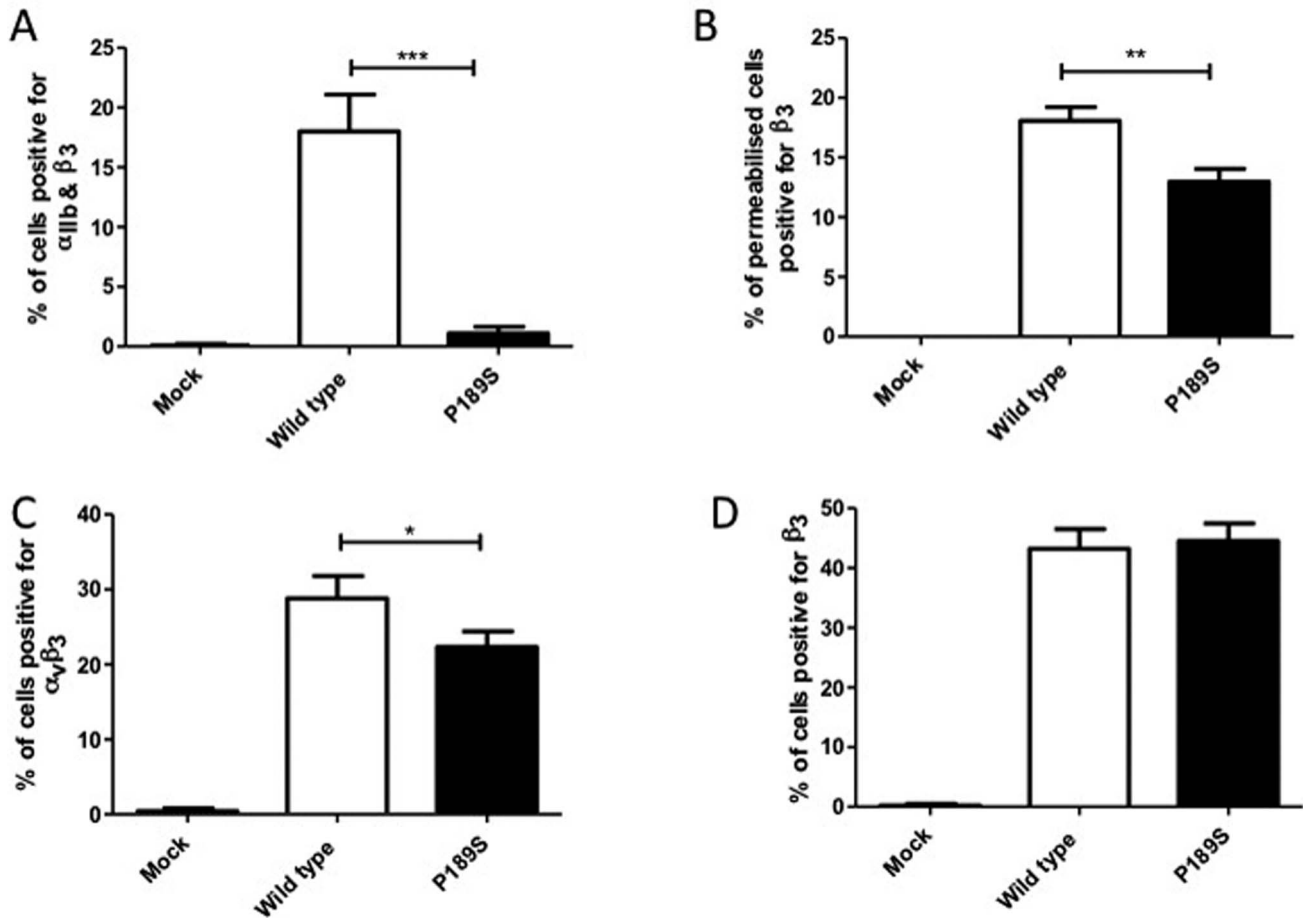

**Figure 2. Expression of normal and mutated  $\alpha_{IIb}\beta_3$  and  $\alpha_v\beta_3$  in CHO cells.** CHO cells were transfected with either wild type or mutated  $\beta_3$  P163S expression plasmids alone (C, D) or in the presence of wild type  $\alpha_{IIb}$  expression plasmid (A, B), or mock transfected with empty vector as a negative control. Forty-eight hours after transfection, the percentage of cells expressing both  $\alpha_{IIb}$  and  $\beta_3$  (A),  $\alpha_v\beta_3$  (C) and  $\beta_3$  (D) were determined by flow cytometry. Intracellular expression of  $\beta_3$  was assessed after permeabilization of the cells (B). Data represent the mean and standard deviation of three independent experiments. \*\*\* $p < 0.001$ , \*\* $p < 0.01$ , \* $p < 0.05$  as calculated by unpaired t-tests. doi:10.1371/journal.pone.0078683.g002

the two forms of  $\alpha_{IIb}\beta_3$  (Figure 6A) shows that the mutation only slightly displaces the small alpha-helix close to position 163 (lower yellow arrow) but results in the small alpha-helix beginning at position 259 (yellow\*) moving away from the interface (approximately  $-3.5 \text{ \AA}$ ). This  $3_{10}$ - $\alpha$ -helix contains  $\beta_3R261$  that is now localized  $3.5 \text{ \AA}$  outside of the  $\alpha_{IIb}$  headpiece when compared to the WT conformation. In contrast,  $\beta_3R261$  sinks deep into the  $\beta$ -propeller of the  $\alpha_v$  headpiece (approximately  $4.4 \text{ \AA}$  in comparison to the WT conformation).

## Discussion

The crystal structure of the extracellular segment of integrin  $\alpha_v\beta_3$  provided the first clear insights into the extracellular head domain structure and how conformation changes with the activation state of the integrin [14–19]. Close contacts between the two subunits primarily involved the  $\alpha_v$   $\beta$ -propeller and the  $\beta_3$   $\beta$ -I ( $\beta_A$ ) domains.  $\beta$ -I also contains functionally important MIDAS and ADMIDAS sequences with 3 metal ion-binding domains. A key residue is  $\beta_3R261$  that lies at the core of the  $\beta$ -I domain- $\beta$ -propeller interface and is surrounded by two concentric rings of predominantly aromatic  $\alpha$ -subunit  $\beta$ -propeller residues. Side-chains of F21, F159, Y224, F278 and Y406 from the lower ring

were said to interact with R261 directly. Residues Y18, W93, Y221, Y273 and S403 in the upper ring contact side-chains in the lower ring and provide a hydrophobic interface for residues flanking  $\beta_3R261$  in the so-called  $3_{10}$ - $\alpha$ -helix [14]. Additional contacts were also shown between more distant parts of the head domains of both subunits. It was noted even at this early time that  $\beta_3P163$ , the amino acid mutated in our patient, lies in a loop adjacent to the  $3_{10}$ -helix of  $\alpha_v$ .

Homology models were first used to extrapolate results for  $\alpha_v\beta_3$  to  $\alpha_{IIb}\beta_3$  and predict contact interactions between  $\alpha_{IIb}$  and  $\beta_3$ . These became redundant when a refined crystal structure of the complete  $\alpha_{IIb}\beta_3$  ectodomain obtained in the presence of  $Ca^{2+}$  and  $Mg^{2+}$  permitted direct analyses [16–19]. Water molecules that favor hydrogen bonding and metal coordination were located in the  $\alpha_{IIb}\beta_3$  but not the  $\alpha_v\beta_3$  structure. Particularly highlighted were three non-conserved loop region structures (residues 71–85, 114–125 and 148–164) of human  $\alpha_{IIb}$  while K118 was said to form a salt bridge with E171 in the specificity-determining loop (SDL) of  $\beta_3$  (residues 159–188) that contains P163. The structural importance of these residues is highlighted by the large number of missense mutations in the  $\beta$ -propeller region of  $\alpha_{IIb}$  detected in patients with classic type I GT [2,3,27]. Crystallography also predicted that  $\alpha_{IIb}$  residues L116, K124 and R153 were close to

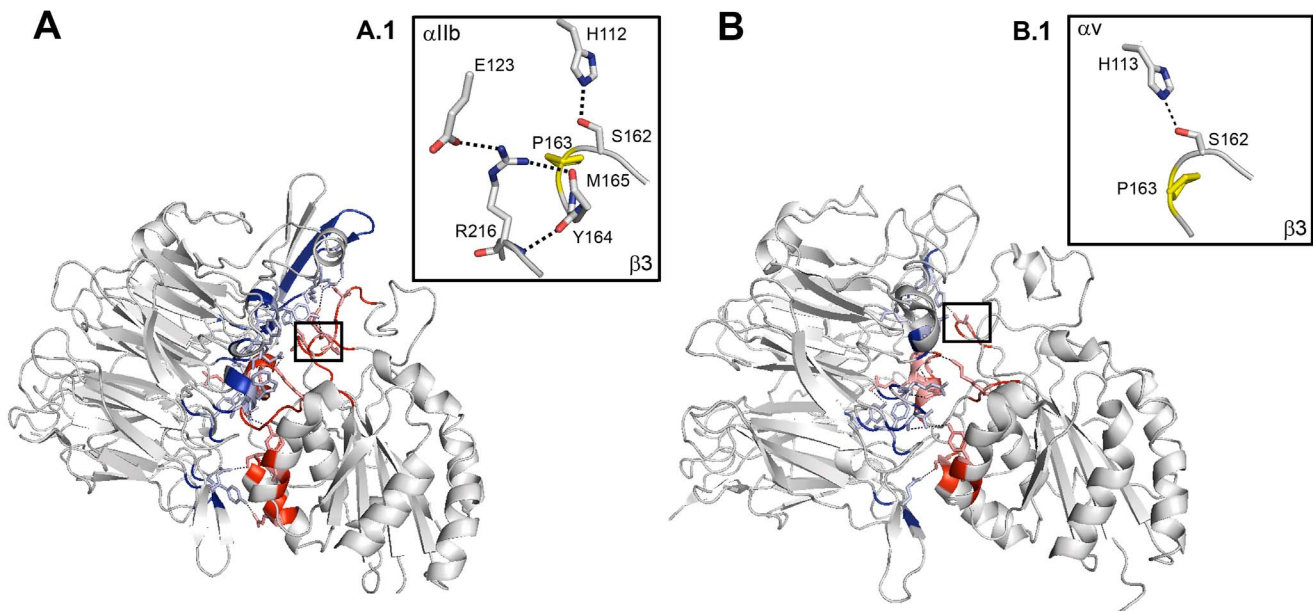

**Figure 3. Static modeling showing the positioning of  $\beta 3$ P163.** Panel (A) represents computer-drawn ribbon diagrams of the WT  $\alpha$ IIb and  $\beta 3$  headpiece complex and panel (B) the corresponding structure for WT  $\alpha$ V and  $\beta 3$  subunits. Interacting surfaces are colored in blue for  $\alpha$ IIb or  $\alpha$ V, and in red for  $\beta 3$ . Amino acids forming a H-bond with their counterpart in the other subunit are represented as sticks. H-bonds are shown as dotted lines. Interactions modified by the mutation are highlighted in boxes A.1 and B.1. The mutated proline is colored in yellow. Models were obtained using the PyMol Molecular Graphics System, version 1.3, Schrödinger, LLC and 3fcs and 1u8c pdb files for the crystal structure of  $\alpha$ IIb in complex with  $\beta 3$  and  $\alpha$ V in complex with  $\beta 3$  in bent conformations. doi:10.1371/journal.pone.0078683.g003

one or more residues of the  $\beta 3$  SDL region.  $\beta 3$  residues I167, S168 and P169 were said to have a side chain or backbone within 5 Å of  $\alpha$ IIb residues. Further proof for residues in close contact came from a cysteine substitution model that provoked the formation of disulfide-linked dimers when the mutated  $\alpha$ IIb and  $\beta 3$  subunits were transfected into HEK 293 cells [16].

It is in this context that we now report a GT patient with a  $\beta 3$  P163S substitution with little or no expression of  $\alpha$ IIb $\beta 3$  at the platelet surface but with residual  $\beta 3$  and a usual presence of  $\alpha$ V $\beta 3$  in her platelets. Transfection of WT and mutated integrins in CHO cells recapitulated the loss of cell surface expression of  $\alpha$ IIb $\beta 3$  in cells co-transfected with WT  $\alpha$ IIb and  $\beta 3$ S163, and

confirmed the capacity of the mutated  $\beta 3$  to bind endogenous hamster  $\alpha$ V and form a heterodimer that was transferred to the cell surface. Notwithstanding, differences in surface expression of chimeric  $\alpha$ V $\beta 3$  were observed (Figure 2) depending on the use of a monoclonal antibody to human  $\beta 3$ , which detected similar levels of  $\alpha$ V $\beta 3$  in cells transfected with the  $\beta 3$ S163 variant compared to those transfected with WT  $\beta 3$ , or a monoclonal antibody to human  $\alpha$ V $\beta 3$ , which showed a reduced expression between the WT  $\alpha$ V $\beta 3$  and the  $\alpha$ V $\beta 3$ S163. The latter most likely reflects differences in the ability of hamster  $\alpha$ V to bind to WT  $\beta 3$  and  $\beta 3$ S163 or to conformational changes within the epitope recognized by the LM609 antibody. For platelets of the patient,

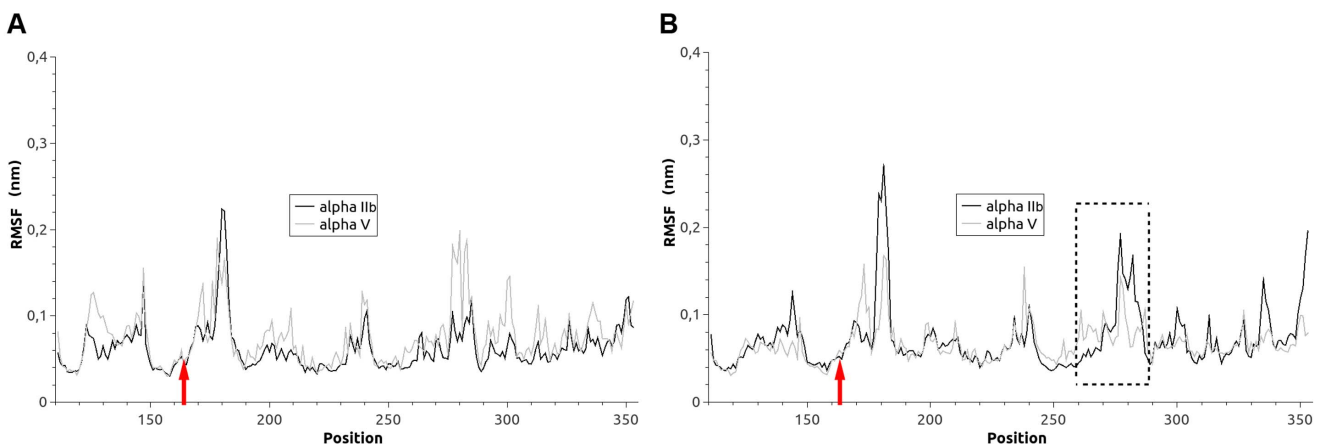

**Figure 4. Effect of the  $\beta 3$ P163 substitution on the backbone flexibility of  $\beta 3$  within the integrin complex.** RMSF values are calculated for each residue within WT  $\beta 3$  (A) and P163S  $\beta 3$  (B) in complex with either  $\alpha$ IIb (heavy line) or  $\alpha$ V (faint line). Red arrows indicate the position of the mutation. The largest changes are seen approximately 100 amino acids forward from the mutation (dotted box). doi:10.1371/journal.pone.0078683.g004

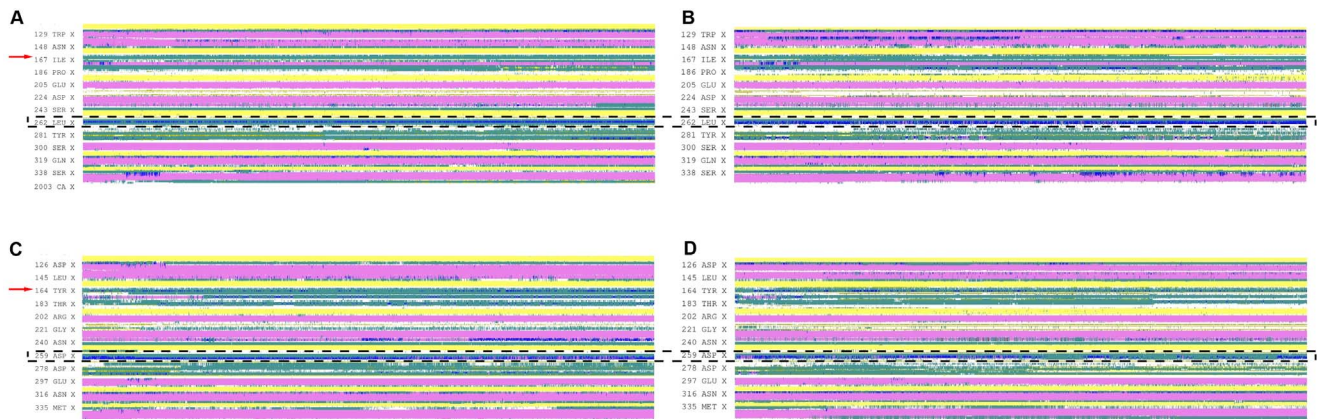

**Figure 5. Timeline plots of the  $\beta 3$  secondary structure.** Illustrated are the WT form (A, C) and the P163S mutated form (B, D) either associated with  $\alpha IIb$  (A, B) or  $\alpha V$  (C, D) subunits. Shown are molecular dynamics time and primary sequence: time (60 ns) is on the horizontal axis and primary sequence is on the vertical axis. The following color code is used for the secondary structure: dark green = turn, yellow =  $\beta$ -sheet, pink =  $\alpha$ -helix, blue = 3–10 helix, white = random. Position 163 is indicated by red arrows and the region concerned by the major changes is framed with a dotted box.

doi:10.1371/journal.pone.0078683.g005

$\alpha V\beta 3$  had a mostly vesicular localization as previously described by us for normal platelets and for those of another type I GT patient with a homozygous *ITGA2B* E324K mutation and residual  $\beta 3$  [8]. The reason for this localization is unknown but is consistent with a trafficking role for  $\alpha V\beta 3$ ; roles for  $\alpha V\beta 3$  in transport of vitronectin and in the sensing of bacterial lipopeptides have been previously described [28,29]. As this was not a major thrust of our paper the localization of  $\alpha V\beta 3$  was not studied further. Significantly an adjacent  $\beta 3$ S162L mutation was previously reported in a GT patient with much decreased amounts of platelet  $\alpha IIb\beta 3$ ; S162 lies close to blade 2 of the propeller and its replacement by L162 results in unfavorable contacts at the  $\alpha IIb$  and  $\beta 3$  interface undermining the structural importance of this particular  $\beta$ -I domain;  $\alpha V\beta 3$  was not studied by the authors [27,30].

Computer modeling and a molecular dynamics analysis confirmed that the P163S mutation affected the  $\beta 3$  interface with both  $\alpha V$  and  $\alpha IIb$  and showed the advantages of the dynamic approach in evaluating the structural effects of amino acid

substitutions. The previously detected salt bridge between  $\alpha IIb$ K118 and  $\beta 3$ E171 (16–18) was maintained at least partly in the WT integrin during the molecular dynamics run; but for the P163S mutant and due to the relative movements of the two subunits it was replaced by a salt bridge between  $\beta 3$ E171 and  $\alpha IIb$ R122. Globally,  $\alpha IIb\beta 3$ S163 showed a moderate 11% increase in intra-subunit H-bonds and a very weak decrease in the global H-bond network but  $\alpha V\beta 3$ S163 showed a dramatic 41% increase in intra-subunit H-bonds without modifying the H-bond global network. Compared to the WT proteins, the P163S mutation induces a straightening of the inter-subunit interactions that is slight with  $\alpha IIb\beta 3$  but extensive for  $\alpha V\beta 3$ . These structural rearrangements result in positioning of  $\beta 3$ R261 outside the  $\beta$ -propeller in  $\alpha IIb\beta 3$  but deep inside for  $\alpha V\beta 3$ . All in all, mutated  $\alpha V\beta 3$  appears to have an increased stability perhaps confirmed by the intensity of the residual  $\beta 3$  band observed in the patient's platelets by Western blotting.

Molecular dynamics simulations and modeling of  $\alpha IIb\beta 3$  have recently been reported for a homozygous  $\alpha IIb$  N2D mutation present in 4 siblings of an Israeli Arab family that affects blade 1 of the  $\beta$ -propeller [31]. There was no surface expression of  $\alpha IIb\beta 3$  in platelets or after transfection of the mutated integrin in BHK cells; the mutated pro- $\alpha IIb\beta 3$  complex was formed but trafficking was impaired. N2 is surface exposed on the  $\beta$ -propeller and is highly conserved. Here, a H-bond between N2 and L366 of a calcium-binding domain in blade 6 of  $\alpha IIb$  was disrupted, thereby impairing calcium binding essential for intracellular trafficking of pro- $\alpha IIb\beta 3$ . When the equivalent mutation was introduced into  $\alpha V\beta 3$  it had a less deleterious effect in transfected BHK cells confirming a lower sensitivity of  $\alpha V\beta 3$  to calcium chelation. Molecular dynamic simulations of the wild-type and mutant proteins indicated that aa364–370 fluctuated more in the mutant  $\alpha IIb$  with a shifting out of blade 6 [31].

Other mutations that differentially affect  $\alpha IIb\beta 3$  and  $\alpha V\beta 3$  include a L196P mutation adjacent to the  $\beta 3$  MIDAS (amino acids 118–131) in two French GT patients that allowed residual (10 to 15%) expression of non-functional  $\alpha IIb\beta 3$  [10,11]. Transfection of  $\beta 3$ P196 with wild-type  $\alpha IIb$  in CHO cells confirmed interference with  $\alpha IIb\beta 3$  maturation yet  $\alpha V\beta 3$  was normally expressed [10]; a result similar to that now reported by us for  $\beta 3$ P163S. A  $\beta 3$  L262P mutation gave residual  $\alpha IIb\beta 3$  able to bind fibrin and with

**Table 1. Hydrogen bond changes in the different models.**

|                                                      | $\alpha IIb\beta 3$ WT | $\alpha V\beta 3$ WT | $\alpha IIb\beta 3$ P163S | $\alpha V\beta 3$ P163S |
|------------------------------------------------------|------------------------|----------------------|---------------------------|-------------------------|
| <b>Average number</b>                                |                        |                      |                           |                         |
| H-bonds (inter)                                      | 5.28                   | 4.05                 | 5.86                      | 5.73                    |
| H-bonds (intra)                                      | 150.5                  | 155.6                | 144.6                     | 152.9                   |
| Global                                               | 155.78                 | 159.65               | 150.46                    | 158.63                  |
| <b>% change vs WT <math>\alpha IIb\beta 3</math></b> |                        |                      |                           |                         |
| H-bonds inter                                        |                        | –23.3%               | 11.0%                     |                         |
| H-bonds intra                                        |                        | 3.4%                 | –3.9%                     |                         |
| Global                                               |                        | 2.5%                 | –3.4%                     |                         |
| <b>% change vs WT <math>\alpha V\beta 3</math></b>   |                        |                      |                           |                         |
| H-bonds inter                                        |                        |                      |                           | 41.5%                   |
| H-bonds intra                                        |                        |                      |                           | –1.7%                   |
| Global                                               |                        |                      |                           | –0.6%                   |

Average number of (inter-, intra- or global) H-bonds found during the last 6 ns of the molecular dynamics simulations.

doi:10.1371/journal.pone.0078683.t001

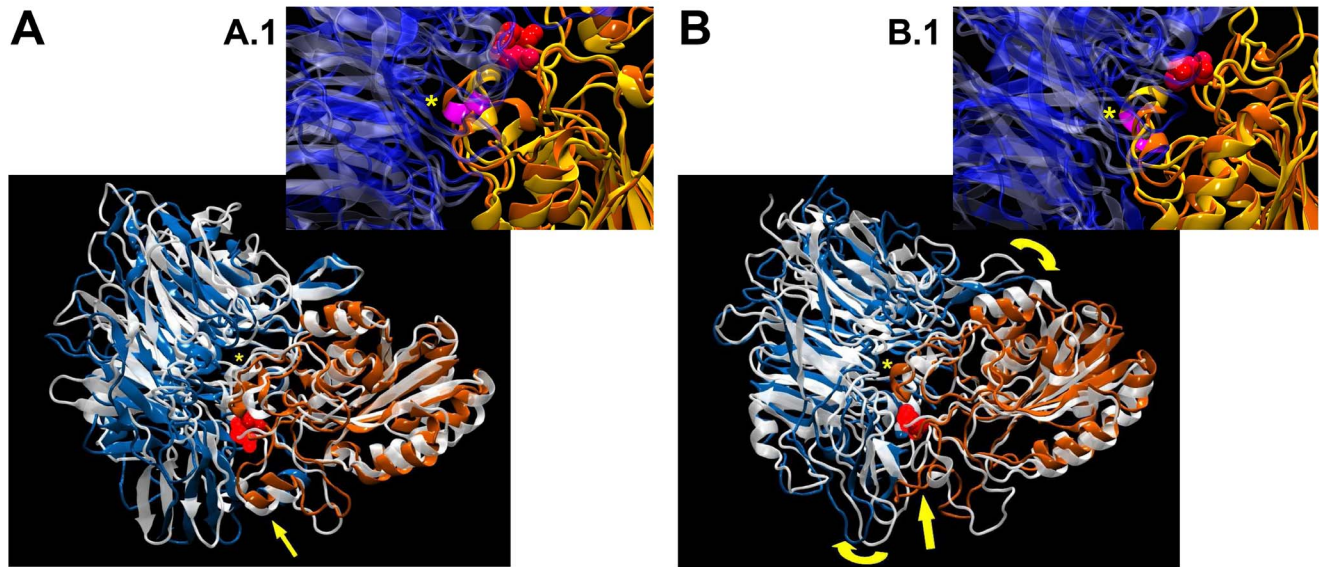

**Figure 6. Summary of the major changes seen in the molecular dynamics runs.** Position 163 on  $\beta 3$  is shown as red spheres. A/ Superimposition of the two forms of  $\alpha\text{IIb}\beta 3$ :  $\alpha\text{IIb}$  associated with WT  $\beta 3$  is in silver glass ribbon while blue ribbon highlights  $\alpha\text{IIb}$  in complex with the  $\beta 3\text{P163S}$  mutant; orange ribbon denotes  $\beta 3$ . Note that the mutation induces only a slight displacement of the small  $\alpha$ -helix close to position 163 (yellow arrow below) and a larger change for the small  $\alpha$ -helix beginning at position 259 but outside of the interface (yellow\*). B/Superimposition of the two forms of  $\alpha\text{V}\beta 3$ :  $\alpha\text{V}$  associated with WT  $\beta 3$  is in silver glass ribbon while blue ribbon shows  $\alpha\text{IIb}$  associated with the  $\beta 3\text{P163S}$  mutant; orange ribbon denotes  $\beta 3$ . Note the unfolding of the small  $\alpha$ -helix close to position 163 (yellow arrow below), the large displacement towards the interface of the  $\alpha$ -helix beginning at position 259 on  $\beta 3$  (yellow\*) and the new fold appearing in the P163S mutant (yellow arrow) that is projected towards the interface resulting in a clockwise rotation of the  $\alpha\text{V}$  sub-unit (yellow curved arrows). Windows correspond to a zoom of the regions marked by the asterisk.

doi:10.1371/journal.pone.0078683.g006

platelets able to retract clots; yet the platelets did not bind Fg when stimulated [32]. Leu262 occurs within an intrachain disulfide loop (between C232 and C273) important for subunit assembly and is joined to  $\beta 3\text{R261}$  in the  $3_{10}$ - $\alpha$ -helix. When transiently transfected with wild-type  $\alpha\text{IIb}$  in COS-7 cells,  $\alpha\text{IIb}\beta 3\text{P262}$  allowed normal heterodimer formation but export from the endoplasmic reticulum was delayed and those complexes that reached the surface were unstable.  $\beta 3\text{P262}$  transfected in human embryonic kidney 293 cells formed a complex with  $\alpha\text{V}$  and retracted fibrin clots although the cells did not interact with immobilized Fg.

As we have reviewed elsewhere, other mutations within  $\beta 3$  mimic  $\beta$ -I domain P163S by differently affecting  $\alpha\text{IIb}\beta 3$  and  $\alpha\text{V}\beta 3$  expression [33]. These include breakage of some of the 56 disulfides in the EGF domains of  $\beta 3$  [13,34–36]. For example, disrupting C473–C503 caused reduced surface expression of  $\alpha\text{V}\beta 3$  relative to  $\alpha\text{IIb}\beta 3$  whereas disruption of C437–C457 by C457S resulted in a significant reduction of  $\alpha\text{IIb}\beta 3$  compared to  $\alpha\text{V}\beta 3$  [13]. Molecular dynamics analysis was performed using a mutated  $\beta 3$  fragment composed of the four EGF domains and  $\beta$ -tail domain derived from  $\alpha\text{IIb}\beta 3$  and  $\alpha\text{V}\beta 3$  crystal structures [13]. The mutated  $\alpha\text{IIb}\beta 3$  structure was changed considerably from the native one and was stable in a new activated conformation whereas the final  $\alpha\text{V}\beta 3$  structure resembled the starting conformation.

Another mutation in  $\beta 3$  exerting a more deleterious effect on  $\alpha\text{IIb}\beta 3$  than  $\alpha\text{V}\beta 3$  expression is H280P (variant Osaka-5). H280P was found in three unrelated Japanese patients (one homozygous and two heterozygous) with residual  $\alpha\text{IIb}\beta 3$  expression [9,37]. Platelets expressed about half the normal amounts of  $\alpha\text{V}\beta 3$  whereas  $\alpha\text{IIb}\beta 3$  levels were reduced to about 6%.

Taken in this context, our studies on  $\beta 3$  P163S provide new evidence as to how missense mutations within the extracellular

domain of  $\beta 3$  can differentially influence  $\alpha\text{IIb}\beta 3$  and  $\alpha\text{V}\beta 3$  expression. We show how  $\beta 3\text{S163}$  affects the three-dimensional structure of the integrins differently and that  $\alpha\text{V}\beta 3$  can even become more stable. This has important implications for considering genotype/phenotype relationships in Glanzmann thrombasthenia. Up-to-now, no clear differences in phenotype have been reported between patients with *ITGA2B* or *ITGB3* mutations [2,3,38]. However, the structural consequences of *ITGB3* missense mutations are clearly variable and therefore it is necessary to establish for each patient how  $\alpha\text{IIb}\beta 3$  and  $\alpha\text{V}\beta 3$  are affected. In this respect, the human disease differs from mouse models where the *Itgb3* gene is specifically deleted [2].

## Supporting Information

**Figure S1 Flow cytometry measuring the binding of selected monoclonal antibodies to platelets of the patient.** This study was performed according to our standard procedures using a Becton Dickinson FACScan [39,40]. Note the minimal binding of AP2 (anti  $\alpha\text{IIb}\beta 3$ ) and Tab (anti-  $\alpha\text{IIb}$ ); a slightly higher binding of AP3 (anti- $\beta 3$ ) and a normal binding of BX1 (anti-GPIIb/IIIa) to the platelets of the patient.

(TIF)

**Figure S2 Conservation of  $\beta 3$  Pro163.** Residue P163 (\*) of  $\beta 3$  is highly conserved within mammals and vertebrates (A) and within different integrin  $\beta$ -subunits in man (B). Also shown is the highly conserved nature of  $\alpha\text{IIb}$  amino acids (C) and of  $\alpha\text{V}$  amino acids (D) forming H-bonds with  $\beta 3\text{P163}$ . In dotted boxes are amino acids participating in H-bonds within  $\alpha\text{IIb}\beta 3$  but not within  $\alpha\text{V}\beta 3$ .

(TIF)



**Figure S3 Molecular dynamics analysis.** Plots of RMSD vs. time of the global integrin complex of the  $\alpha v$  and  $\beta 3$  subunit headpieces during a complete (60 ns) molecular dynamics run. Shown are the results for wild-type  $\alpha IIb\beta 3$  and  $\alpha v\beta 3$  and for  $\alpha IIb\beta 3S163$  and  $\alpha v\beta 3S163$ . (TIF)

**Figure S4 3D-modelisation of amino acids interacting with  $\beta 3$ .** Amino acids are represented as sticks;  $\beta 3R261$  is coloured in magenta while amino acids from  $\alpha IIb$  or  $\alpha v\beta 3$  are coloured in dark green for the wild type integrin and in pink and

light green for the mutated form. The initial position for  $\beta 3R261$  is superimposed as a transparent image. (TIF)

**Case History S1.**  
(DOCX)

## Author Contributions

Conceived and designed the experiments: ML XP MD PN ATN. Performed the experiments: ML XP JS ES. Analyzed the data: ML XP MD PN ATN. Wrote the paper: ML XP MD ATN.

## References

- George JN, Caen JP, Nurden AT (1990) Glanzmann's thrombasthenia: The spectrum of clinical disease. *Blood* 75: 1383–1395.
- Nurden AT, Fiore M, Nurden P, Pillois X (2011) Glanzmann thrombasthenia: a review of ITGA2B and ITGB3 defects with emphasis on variants, phenotypic variability, and mouse models. *Blood* 118: 5996–6005.
- Nurden AT, Pillois X, Nurden P (2012) Understanding the genetic basis of Glanzmann thrombasthenia: Implications for treatment. *Exp Rev Hematol* 5: 487–503.
- Wilhide CC, Jin Y, Guo Q, Li L, Li SX, et al. (1997) The human integrin beta3 gene is 63 kb and contains a 5'-UTR sequence regulating expression. *Blood* 90: 3951–3961.
- Thon JN, Italiano JE (2012) Platelets: production, morphology and ultrastructure. *Handb Exp Pharmacol* 210: 3–22.
- Hynes RH (2002) Integrins: bidirectional, allosteric signaling machines. *Cell* 110: 673–687.
- Desgrosellier JS, Cheresh DA (2010) Integrins in cancer: biological implications and therapeutic opportunities. *Nat Rev Cancer* 10: 9–22.
- Poujol C, Nurden AT, Nurden P (1997) Ultrastructural analysis of the distribution of the vitronectin receptor ( $\alpha v\beta 3$ ) in human platelets and megakaryocytes reveals an intracellular pool and labelling of the  $\alpha$ -granule membrane. *Br J Haematol* 96: 823–835.
- Tadokoro S, Tomiyama Y, Honda S, Kashiwagi H, Kosugi S, et al. (2002) Missense mutations in the  $\beta 3$  subunit have a different impact on the expression and function between  $\alpha IIb\beta 3$  and  $\alpha v\beta 3$ . *Blood* 99: 931–938.
- Morel-Kopp M-C, Melchior C, Chen P, Ammerlaan W, Lecompte T, et al. (2001) A naturally occurring point mutation in the  $\beta 3$  integrin MIDAS-like domain affects differently  $\alpha v\beta 3$  and  $\alpha IIb\beta 3$  receptor function. *Thromb Haemost* 86: 1425–1434.
- Nurden A, Ruan J, Pasquet J-M, Gauthier B, Combric R, et al. (2002) A novel Leu<sup>196</sup> to Pro substitution in the  $\beta 3$  subunit of the  $\alpha IIb\beta 3$  integrin in a patient with a variant form of Glanzmann thrombasthenia. *Platelets* 13: 101–111.
- Hauschner H, Landau M, Seligsohn U, Rosenberg N (2010) A unique interaction between  $\alpha IIb$  and  $\beta 3$  in the head region is essential for outside-in signaling-related functions of  $\alpha IIb\beta 3$  integrin. *Blood* 115: 4542–4550.
- Mor-Cohen R, Rosenberg N, Einav Y, Zelzion E, Landau M, et al. (2012) Unique disulfide bonds in epidermal growth factor (EGF) domains of  $\beta 3$  affect structure and function of  $\alpha IIb\beta 3$  and  $\alpha v\beta 3$  integrins in different manner. *J Biol Chem* 287: 8878–8891.
- Xiong JP, Stehle T, Diefenbach B, Zhang R, Dunker R, et al. (2001) Crystal structure of the extracellular segment of integrin  $\alpha v\beta 3$ . *Science* 294: 339–345.
- Xiong JP, Stehle T, Zhang R, Joachimiak A, Frech M, et al. (2002) Crystal structure of the extracellular segment of integrin  $\alpha v\beta 3$  in complex with an Arg-Gly-Asp ligand. *Science* 296: 151–155.
- Filizola M, Hassan SA, Artoni SA, Collier BS, Weinstein H (2004) Mechanistic insights from a refined three-dimensional model of integrin  $\alpha IIb\beta 3$ . *J Biol Chem* 279: 24624–24630.
- Zhu J, Luo BH, Xiao T, Zhang C, Nishida N, et al. (2008) Structure of a complete integrin ectodomain in a physiologic resting state and activation and deactivation by applied forces. *Mol Cell* 32: 849–861.
- Xiao T, Takagi J, Collier BS, Wang JH, Springer TA (2004) Structural basis for allostery in integrins and binding to fibrinogen-mimetic therapeutics. *Nature* 432: 59–67.
- Zhu J, Zhu J, Negri A, Provasi D, Filizola M, et al. (2010) Closed headpiece of integrin  $\alpha IIb\beta 3$  and its complex with an  $\alpha IIb\beta 3$ -specific antagonist that does not induce opening. *Blood* 116: 5050–5059.
- Nurden AT, Didry D, Kieffer N, McEver RP (1985) Residual amounts of glycoproteins IIb and IIIa may be present in the platelets of most patients with Glanzmann's thrombasthenia. *Blood* 65: 1021–1024.
- Djaffar I, Caen JP, Rosa JP (1993) A large alteration in the human platelet glycoprotein IIIa (integrin  $\beta 3$ ) gene associated with Glanzmann's thrombasthenia. *Hum Mol Genet* 2: 2183–2185.
- Van Gunsteren WF, Berendsen HJC (1987) Gromos-87 Manual, BIOMOS, B.V., Groningen, The Netherlands.
- Berendsen HJC, Postma JPM, Vangunsteren WF, Dinola A, Haak JR (1984) Molecular dynamics with coupling to an external bath. *J Chem Phys* 81: 3684–3690.
- Darden TA, Pedersen LG (1993) Molecular modeling - an experimental tool. *Environ Health Persp* 101: 410–412.
- Jallu V, Poulain P, Fuchs PEJ, Kaplan C, De Brevern AG (2012) Modeling and molecular dynamics of HPA-1a and -1b polymorphisms: Effects on the structure of the  $\beta 3$  subunit of the  $\alpha IIb\beta 3$  integrin. *PLoS One* 7: e47304.
- Jacquelin B, Tuleja E, Kunicki TJ, Nurden P, Nurden AT (2003) Analysis of platelet plasma membrane polymorphisms in Glanzmann thrombasthenia showed the French gypsy mutation in the  $\alpha IIb$  gene to be strongly linked to the HPA-1 polymorphism in  $\beta 3$ . *J Thromb Haemost* 1: 573–575.
- Nelson EJR, Li J, Mitchell WB, Chandy M, Srivastava A, et al. (2005) Three novel  $\beta$ -propeller mutations causing Glanzmann thrombasthenia result in production of normally stable pro- $\alpha IIb$ , but variably impaired progression of pro- $\alpha IIb\beta 3$  from endoplasmic reticulum to Golgi. *J Thromb Haemost* 3: 2773–2783.
- Gerold G, Abu Alai K, Bienert M, Laws HJ, Zychlinski A, et al. (2008) A toll-like receptor 2-integrin  $\beta 3$  complex senses bacterial lipopeptides via vitronectin. *Nat Immunol* 9: 761–768.
- Collier BS, Seligsohn U, West SM, Scudder LE, Norton KJ (1991) Platelet fibrinogen and vitronectin in Glanzmann thrombasthenia: evidence consistent with specific roles for glycoprotein IIb/IIIa and  $\alpha v\beta 3$  integrins in platelet protein trafficking. *Blood* 78: 2603–2610.
- Jackson DE, White MM, Jennings LK, Newman PJ (1998) A Ser162->Leu mutation within glycoprotein (GP) IIIa (integrin  $\beta 3$ ) results in an unstable  $\alpha IIb\beta 3$  complex that retains partial function in a novel form of type II Glanzmann thrombasthenia. *Thromb Haemost* 80: 42–48.
- Mansour W, Einav Y, Hauschner H, Koren A, Seligsohn U, et al. (2011) An  $\alpha IIb$  mutation in patients with Glanzmann thrombasthenia located in the N-terminus of blade 1 of the  $\beta$ -propeller (Asn2Asp) disrupts a calcium binding site in blade 6. *J Thromb Haemost* 9: 192–200.
- Ward CM, Kestin AS, Newman PJ (2000) A Leu262Pro mutation in the integrin  $\beta 3$  subunit results in an  $\alpha IIb\beta 3$  complex that binds fibrin but not fibrinogen. *Blood* 96: 161–169.
- Nurden AT, Pillois X, Wilcox DA (2013) Glanzmann thrombasthenia: State of the art and future directions. *Sem Thromb Hemost* 39: 642–655.
- Calvete J, Henschen A, Gonzalez-Rodriguez J (1999) Assignment of the disulphide bonds in human platelet GPIIIa. A disulphide pattern for the  $\beta$ -subunits of the integrin family. *Biochem J* 74: 63–71.
- Kamata T, Ambo H, Puzon-McLaughlin W, Tieu KK, Hada M, et al. (2004) Critical cysteine residues for regulation of integrin  $\alpha IIb\beta 3$  are clustered in the epidermal growth factor domains of the  $\beta 3$  subunit. *Biochem J* 378: 1079–1082.
- Mor-Cohen R, Rosenberg N, Peretz H, Landau M, Collier BS, et al. (2007) Disulfide bond disruption by a  $\beta 3$ -Cys549Arg mutation in six Jordanian families with Glanzmann thrombasthenia causes diminished production of constitutively active  $\alpha IIb\beta 3$ . *Thromb Haemost* 98: 1257–1265.
- Ambo H, Kamata T, Handa M, Taki M, Kuwajima M, et al. (1998) Three novel integrin  $\beta 3$  subunit missense mutations (H280P, C560F, and G759S) in thrombasthenia, including one (H280P) prevalent in Japanese patients. *Biochem Biophys Res Commun* 251:763–768.
- Fiore M, Firah N, Pillois X, Nurden P, Heilig R, Nurden AT (2012) Natural history of platelet antibody formation against  $\alpha IIb\beta 3$  in a French cohort of Glanzmann thrombasthenia patients. *Haemophilia* 18: e201–209.
- Nurden P, Savi P, Heilmann E, Bihour C, Herbert J-M, et al. (1995) An inherited bleeding disorder linked to a defective interaction between ADP and its receptor on platelets. *J Clin Invest* 95: 1612–1622.
- Nurden P, Jandrot-Perrus M, Combric R, Winckler J, Arocas V, et al. (2004) Severe deficiency of glycoprotein VI in a patient with gray platelet syndrome. *Blood* 104: 107–114.
